# Supplementary material
Source: PubMed Central journal article supplement (PMC8504423)
Supplement: NIHMS1743239-supplement-Supplementary_Tables_1_and_2.pdf [file NIHMS1743239-supplement-Supplementary_Tables_1_and_2.pdf]

**Supplementary information**

---

**mSWI/SNF promotes Polycomb repression  
both directly and through genome-wide  
redistribution**

---

In the format provided by the  
authors and unedited

Weber et al., Supplementary Table 1

| Target | sequence                | assay     | notes      |
|--------|-------------------------|-----------|------------|
| Gapdh  | CGTCCCGTAGACAAAATGGT    | qRTPCR    |            |
| Gapdh  | TTGATGGCAACAATCTCCAC    | qRTPCR    |            |
| Hoxa1  | CCACCAGGGTTATGCTGGG     | qRTPCR    |            |
| Hoxa1  | CGTGGAGAGGGGATAAGGAGTTA | qRTPCR    |            |
| Hoxa3  | AAGTGCCAACAGCAACCCTAC   | qRTPCR    |            |
| Hoxa3  | AGGGAAAGATTTGTTTGCCCA   | qRTPCR    |            |
| Hoxa5  | AGGTAGCGGTTGAAGTGGAA    | qRTPCR    |            |
| Hoxa5  | GCTCAGCCCCAGATCTACC     | qRTPCR    |            |
| Hoxa10 | TCTTTGCTGTGAGCCAGTTG    | qRTPCR    |            |
| Hoxa10 | CTCCAGCCCCTTCAGAAAAC    | qRTPCR    |            |
| Hoxb3  | GCTCAGAGGAGGGGAGATTT    | qRTPCR    |            |
| Hoxb3  | GGGGAGAACAGGCAGACATA    | qRTPCR    |            |
| Hoxb5  | CTGGTAGCGAGTATAGGCGG    | qRTPCR    | *sub HoxB4 |
| Hoxb5  | AGGGGCAGACTCCACAGATA    | qRTPCR    | *sub HoxB4 |
| Hoxb7  | GCCGCAAGTTCGGTTTTCG     | qRTPCR    |            |
| Hoxb7  | GCAAAGGCGCAAGAAGTTTGT   | qRTPCR    |            |
| Hoxb13 | GATGTGTTGCCAAGGTGAAC    | qRTPCR    |            |
| Hoxb13 | CCTTGCTATAGGGAATGCGT    | qRTPCR    |            |
| Hoxd10 | TCTCCTGCACTTCGGGAC      | qRTPCR    |            |
| Hoxd10 | GGAGCCCCTAAAGTCTCCC     | qRTPCR    |            |
| Hoxd11 | AGGTTGAGCATCCGAGAGAG    | qRTPCR    |            |
| Hoxd11 | GAAAAAGCGCTGTCCCTACA    | qRTPCR    |            |
| Hoxd13 | TGGTGTAAGGCACCCTTTTTC   | qRTPCR    |            |
| Hoxd13 | CCCATTTTTTGAAATCATCC    | qRTPCR    |            |
| Bmi1   | TACCATGAATGGAACCAGCA    | qRTPCR    |            |
| Bmi1   | AAAGGAAGCAAACCTGGACGA   | qRTPCR    |            |
| Meis2  | GACCACAACCCTTCATCCTG    | qRTPCR    |            |
| Meis2  | TTGTCTAACCCTCGCCTTG     | qRTPCR    |            |
| Pax6   | CCCTCACCAACACGTACAG     | qRTPCR    |            |
| Pax6   | TCATAACTCCGCCATTAC      | qRTPCR    |            |
| U6     | CGCTTCGGCAGCACATATAC    | qRTPCR    |            |
| U6     | TTCACGAATTTGCGTGTGTCAT  | qRTPCR    |            |
| Gjb3   | TCTGGCTGTCAGTAGTGTTCG   | qRTPCR    |            |
| Gjb3   | GCCTGGTGTACAGTCAAAGTC   | qRTPCR    |            |
| Lrrc34 | TTGCACTTTCCCAGTCAATG    | qRTPCR    |            |
| Lrrc34 | TTTCTCCATAAGTCGGTGCC    | qRTPCR    |            |
| Mcsm   | CCCAGAGGAACCAACTATTCAAG | qRTPCR    |            |
| Mcsm   | ACAGGTAGCAACCTCCCTGAG   | qRTPCR    |            |
| Ngfr   | GCCGAATGCGAGGAGATCCCT   | qRTPCR    |            |
| Ngfr   | GGTCACCGTATCGGCCACTGT   | qRTPCR    |            |
| HoxA5  | GCTGGAGAGAGGCGAGACTA    | ChIP qPCR |            |
| HoxA5  | GTAAAGCCAGCCGTTTTCTG    | ChIP qPCR |            |
| HoxA10 | GTCGACCAAAAAGGAGTTCG    | ChIP qPCR |            |
| HoxA10 | TGTCAGCCAGAAAGGGCTAT    | ChIP qPCR |            |
| Zfp467 | GCAGCCGAGTAAGTGGTAGC    | ChIP qPCR |            |
| Zfp467 | TGACCGATTCTCCAATCTC     | ChIP qPCR |            |

|        |                      |           |  |
|--------|----------------------|-----------|--|
| HoxB4  | AGGGAGTGTTGAGGAGGACA | ChIP qPCR |  |
| HoxB4  | GCGAGCAGATCGATAGGAAA | ChIP qPCR |  |
| HoxB13 | AACACGCATGTGAAAGTGGA | ChIP qPCR |  |
| HoxB13 | CTCACACCAGGAGTCTGCAA | ChIP qPCR |  |
| HoxD11 | GAACAGAGCGGAAAAACCTG | ChIP qPCR |  |
| HoxD11 | AGAGTGCAGACCCTGGAAAA | ChIP qPCR |  |
| HoxD13 | GGGTGACGCGGTAGACTAAG | ChIP qPCR |  |
| HoxD13 | GCACACCAAAGTGAGGATGA | ChIP qPCR |  |
| Bmi1   | CGCCCTTTGTTGAGAGGTAG | ChIP qPCR |  |
| Bmi1   | ACCTCCAGAGCCCTTTCTTC | ChIP qPCR |  |
| Meis2  | GCTCGCACTTCTCAAAAACC | ChIP qPCR |  |
| Meis2  | GTTCTTGCTCCTTCCCCTCT | ChIP qPCR |  |
| Gjb3   | ACGCTGGTTACCACGGATAC | ChIP qPCR |  |
| Gjb3   | CCCAAGAGCGTACGAAAACT | ChIP qPCR |  |
| Lrrc34 | GCTGTCAGTGCTGGATTTGA | ChIP qPCR |  |
| Lrrc34 | GTGAGCTCGGTGAGAAGCTC | ChIP qPCR |  |
| Mcam   | GGGAGTTTGGGGATGTCTTC | ChIP qPCR |  |
| Mcam   | CCCGACTCTACGTTGCTACC | ChIP qPCR |  |
| Ngfr   | CAAAATTACACGCTGTTCGT | ChIP qPCR |  |
| Ngfr   | GGTGTAGGAGACTGGGAGCA | ChIP qPCR |  |

Weber et al., Supplementary Table 2

**Antibody**

|                                                       | <b>Source</b> | <b>Identifier</b>           |
|-------------------------------------------------------|---------------|-----------------------------|
| Rabbit monoclonal anti-Ring1b (ChIP & WB)             | CST           | Cat #5694; RRID:AB_10705604 |
| Rabbit polyclonal anti-Suz12 (ChIP & WB)              | Active Motif  | Cat #39057; RRID:AB_2614929 |
| Rabbit polyclonal to Histone H3 (acetyl K27) (ChIP)   | Abcam         | Cat#ab4729                  |
| Rabbit polyclonal to Histone H3 (trimethyl K27) (WB)  | Active Motif  | Cat#39155; RRID:AB_2561020  |
| Rabbit monoclonal to Histone H3 (trimethyl K4) (ChIP) | Sigma         | Cat#04-745                  |
| Rabbit monoclonal to CTCF (WB)                        | Abcam         | Cat#ab128909                |
| Mouse monoclonal to Brg1 (WB)                         | Santa Cruz    | Cat#sc-374197               |
| Rabbit polyclonal to EED (WB)                         | CST           | Cat#51673                   |
| Rabbit monoclonal to Histone H2A (ub K119) (WB)       | CST           | Cat#8240                    |
| Mouse monoclonal to Histone H3 (WB)                   | CST           | Cat#3638                    |
| Rabbit polyclonal to PCGF1                            | Sigma         | Cat#HPA11356                |
